# Supplementary material for: KDM4B-mediated reduction of H3K9me3 and H3K36me3 levels improves somatic cell reprogramming into pluripotency
Source: PubMed Central journal article supplement (PMC5548918; doi:10.1038/s41598-017-06569-2), 2017-08-08
Supplement: 41598_2017_6569_MOESM1_ESM.pdf [file 41598_2017_6569_MOESM1_ESM.pdf]

## **SUPPLEMENTARY INFORMATION**

KDM4B-mediated reduction of H3K9me3 and H3K36me3 levels improves somatic cell reprogramming into pluripotency

Jingwei Wei, Jisha Antony, Fanli Meng, Paul MacLean, Rebekah Rhind, Götz Laible, Björn Oback

## **SUPPLEMENTAL MATERIALS AND METHODS**

### **Teratomas**

iPSC lines at passage 3-6 were harvested with a cell scraper, centrifuged and re-suspended in PBS + 1% PVA (10-30k). Using a 23G needle, 100  $\mu$ l of cell suspension (approx.  $1 - 5 \times 10^6$  cells per site) was injected intramuscularly into the quadriceps of adult immune-deficient mice. After 5–7 weeks, tumors were dissected, fixed overnight in Davidson's fixative, embedded in paraffin, sectioned, haematoxylin–eosin stained and analyzed by a pathologist service (NZVP, Hamilton, NZ).

### **Chimeras**

iPSC lines were either aggregated with morulae or injected into host blastocysts (Swiss or FVB/NJArc) and transferred into the oviduct of day 0.5 pseudo-pregnant females. Coat-colour chimeras were bred with Swiss females for germline transmission.

## SUPPLEMENTAL FIGURES

Figure S1

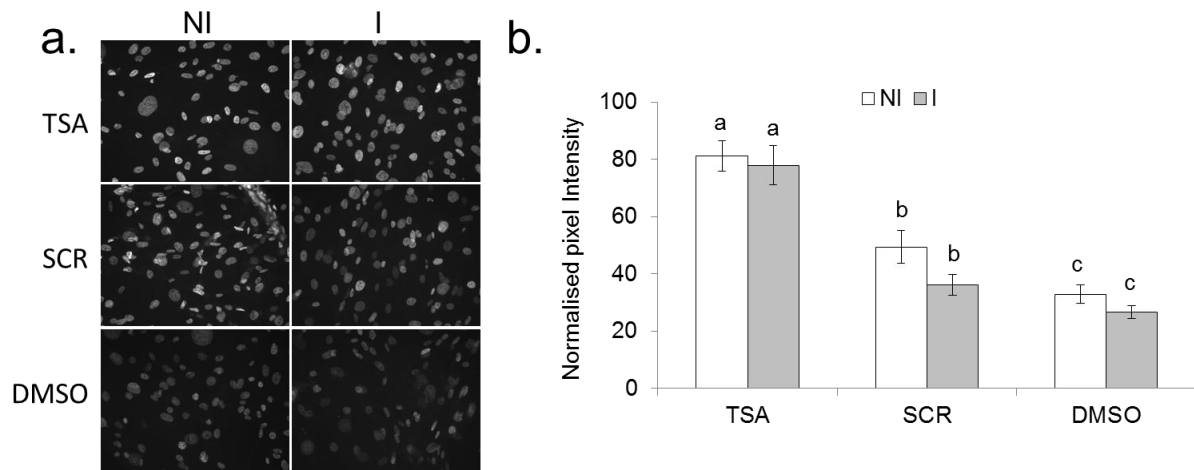

## SUPPLEMENTAL FIGURE LEGENDS

### **Figure S1. Effect of HDACi on F-*Kdm4b*-EGFP expressing MEFs (a)**

Immunofluorescence of H3K9ac in 48 h non-induced (NI) vs induced (I) F-*Kdm4b* MEFs. **(b)**

Quantification of immunofluorescence analysis in (A). Values represent normalized pixel intensity (ROI/area)  $\pm$  SEM. Asterisks indicate significant differences between induced (I) vs non-induced (NI) MEFs and their corresponding HDACi treatments (N=20 nuclei quantified per treatment, n=4 replicates). Within each group (NI vs I), bars with different superscripts differ <sup>ab</sup>P<0.005 by two-tailed unpaired t-test.

## SUPPLEMENTAL TABLES

**Supplemental Table 3.** Functional annotation of differently expressed genes upon *Kdm4b*-induction

| <b><i>Top 3 Molecular and Cellular Functions*</i></b>                                                          | <b><i>P-value</i></b> |
|----------------------------------------------------------------------------------------------------------------|-----------------------|
| Cellular Compromise                                                                                            | 5.60E-03 - 1.65E-04   |
| Cellular Function and Maintenance                                                                              | 5.60E-03 - 1.65E-04   |
| Cell Death and Survival                                                                                        | 3.74E-03 - 6.24E-04   |
| <b><i>Top 3 Canonical Pathways</i></b>                                                                         | <b><i>P-value</i></b> |
| Oncostatin M Signaling                                                                                         | 2.10E-02              |
| Inhibition of Matrix Metalloproteases                                                                          | 2.41E-02              |
| Transcriptional Regulatory Network in Embryonic Stem Cells                                                     | 2.47E-02              |
| <b><i>Top 3 Associated Network Functions</i></b>                                                               | <b><i>Score</i></b>   |
| Cell Cycle                                                                                                     | 27                    |
| Immunological Disease, Molecular Transport                                                                     | 3                     |
| Carbohydrate Metabolism, Skeletal and Muscular System<br>Development and Function, Small Molecule Biochemistry | 3                     |

\*Gene Ontology was determined by QIAGEN's Ingenuity® Pathway Analysis.

**Supplemental Table 4:** In vitro development of F-*Kdm4b* NT reconstructs treated  $\pm$  HDACi

| Induction <sup>a</sup> | HDACi <sup>b</sup> | n  | nNT <sup>c</sup> | Morulae (% $\pm$ SEM)         | Blastocysts (% $\pm$ SEM)    |
|------------------------|--------------------|----|------------------|-------------------------------|------------------------------|
| NI                     | -                  | 5  | 130              | 1 (1 $\pm$ 0.2%) <sup>a</sup> | 1 (1 $\pm$ 1%) <sup>a</sup>  |
| I                      | -                  | 12 | 230              | 16 (7 $\pm$ 1%) <sup>b</sup>  | 11 (5 $\pm$ 2%)              |
| NI                     | SCR                | 2  | 59               | 4 (7 $\pm$ 1%)                | 9 (15 $\pm$ 2%) <sup>b</sup> |
| I                      | SCR                | 4  | 86               | 6 (7 $\pm$ 2%)                | 9 (11 $\pm$ 2%)              |
| NI                     | TSA                | 3  | 81               | 4 (5 $\pm$ 1%)                | 3 (4 $\pm$ 1%)               |
| I                      | TSA                | 9  | 155              | 12 (8 $\pm$ 1%)               | 7 (5 $\pm$ 1%)               |

<sup>a</sup>MEFs (#1, 3, 9) were either Dox-induced (I) or non-induced (NI) for 48 hours: <sup>b</sup>NT

reconstructs were treated with scriptaid (SCR), trichostatin (TSA) or DMSO; <sup>c</sup>number of NT reconstructs that extruded a single polar body and were cultured until day 4. Significance was

determined via Fisher 2x2 test; <sup>ab</sup>Cells with different superscripts within a column differ with

P<0.01

**Supplemental Table 5.** Teratoma formation from *Kdm4b*-EGFP iPSC lines

| Animal ID | Cell line | Dox | Tumor diameter (mm ) | Ectoderm* | Mesoderm* | Endoderm* |
|-----------|-----------|-----|----------------------|-----------|-----------|-----------|
| 1         | #1 iPSC   | -   | 20                   | √         | √         | √         |
|           |           |     | 20                   | ND        | ND        | ND        |
| 2         | #1 iPSC   | +   | 19                   | √         | √         | √         |
|           |           |     | 10                   | ND        | ND        | ND        |
| 3         | #3 iPSC   | -   | No tumor             | -         | -         | -         |
| 4         | #7 iPSC   | -   | 13                   | -         | √         | √         |
| 5         | v6.5 ESC  | -   | 15                   | √         | √         | √         |
|           |           |     | 13                   | ND        | ND        | ND        |

\*Germ layer identity was determined on histological sections (Fig. 6D). ID=unique animal

identifier; ND=not determined

**Supplemental Table 6.** Chimera formation from *Kdm4b*-EGFP iPSC lines

| iPSC line                                       | sex | No. of born mice | Chimaeras* | % of Chimaeras* |
|-------------------------------------------------|-----|------------------|------------|-----------------|
| #1 <i>Col1a1</i> <sup>4F2a/F-<i>Kdm4b</i></sup> | ♀   | 18               | 3          | 17%             |
| #7 <i>Col1a1</i> <sup>4F2a/F-<i>Kdm4b</i></sup> | ♂   | 2                | 1          | 50%             |

\*Chimerism was determined by coat colour (Fig. 6E).

**Supplemental Table 7: Primer sequences used for qPCR**

| Primer                   |    | Sequence (5'- 3')        | Size (bp) | Reference  |
|--------------------------|----|--------------------------|-----------|------------|
| <i>2810474019Rik</i>     | F: | TTTCTGTCTCGGTCTTCCGC     | 181       | This paper |
|                          | R: | CACGCCTCTAATTCTGTTTTTCCA |           |            |
| <i>Actb</i>              | F: | CAGAAGGACTCCTATGTGGG     | 200       | 1          |
|                          | R: | TTGGCCTTAGGGTTCAGGG      |           |            |
| <i>Transgene Kdm4b</i>   | F: | AGAAGACACCGGGACCGATC     | 190       | 2          |
|                          | R: | TGAATTCATCCATGGTGGGG     |           |            |
| <i>C430002N11Rik</i>     | F: | AGCCCCTTCGGCTGTTTTTA     | 136       | This paper |
|                          | R: | GGGCTGAACCTCCTTCTGTC     |           |            |
| <i>Chst13</i>            | F: | ATGGGAAGACGCTCCTGTTG     | 98        | This paper |
|                          | R: | TTTTCAAATGCGGGACGCAG     |           |            |
| <i>Cola1 (Wild-type)</i> | F: | GCTCGCACGTACTTCATTCC     | 400       | This paper |
|                          | R: | GAGAGTTCCTTGAGGGCTGG     |           |            |
| <i>Endo Kdm4B</i>        | F: | AGAAGCCTTCCTGTTCTCAG     | 189       | 2          |
|                          | R: | TGTA CTGACTGGCTGTAGGG    |           |            |
| <i>Ephx2</i>             | F: | GGGAAAGGAATTTACCCCGCT    | 72        | This paper |
|                          | R: | GAGTGGTACCCACTGGGCTG     |           |            |
| <i>Gapdh</i>             | F: | TGCACCACCAACTGCTTAG      | 176       | 1          |
|                          | R: | GATGCAGGGATGATGTTC       |           |            |
| <i>Glipr1</i>            | F: | CGTGCAGTGATTGCCCAAAA     | 90        | This paper |
|                          | R: | CGACAGAGTAGTAACGTGAGACC  |           |            |
| <i>Gpr56</i>             | F: | TTTTCTCTGGTGCAAGGTGC     | 192       | This paper |
|                          | R: | GAAGCGGGGAATATCTGGGG     |           |            |
| <i>Gusb</i>              | F: | ATAAGACGCATCAGAAGCCG     | 96        | 3          |
|                          | R: | ACTCCTCACTGAACATGCGA     |           |            |
| <i>Hprt</i>              | F: | GAAATGTCAGTTGCTGCGTC     | 332       | 4          |
|                          | R: | GCCAACACTGCTGAAACATG     |           |            |
| <i>Lrrn1</i>             | F: | TCCTCATCCTCCGGCTAGTG     | 93        | This paper |
|                          | R: | GAGACGTGTCCTAAGGCTGG     |           |            |
| <i>Ly6a</i>              | F: | GGAGCTGCTAGGTTTTATCTGTGC | 178       | This paper |



|                           |    |                           |     |            |
|---------------------------|----|---------------------------|-----|------------|
| <i>M2-rtTA</i>            | R: | GGGCAGGTAATTGATGGGCA      | 407 | This paper |
|                           | F: | GAGAGTTCCTTGAGGGCTGG      |     |            |
| <i>Mmp13</i>              | R: | CAATTGCTTGTCTCAGAAGTGG    | 108 | This paper |
|                           | F: | GGAGCCCTGATGTTTCCCAT      |     |            |
| <i>Nnat</i>               | R: | GTCTTCATCGCCTGGACCATA     | 104 | This paper |
|                           | F: | CCACCCACTTTCGGAACCAT      |     |            |
| <i>Prss42</i>             | R: | ACTGGGGACAGGGTCTGC        | 130 | This paper |
|                           | F: | GAAGAGGGGAAGTGGCCTTG      |     |            |
| <i>Rosa26 (Wild-type)</i> | R: | CGTTGTACTGGATTCGGCTGTA    | 700 | This paper |
|                           | F: | GCTGTTTTGGAGGCAGGAAG      |     |            |
| <i>Serpina3g</i>          | R: | TGCCAATGCTCTGTCTAGGG      | 139 | This paper |
|                           | F: | ACAGAGGCTGAAAAGGAGCAG     |     |            |
| <i>Slc29a3</i>            | R: | AGAGGCTGAAGGCAAAGTCA      | 91  | This paper |
|                           | F: | CTTTGAGAGCTACCTGGCAGT     |     |            |
| <i>Sry</i>                | R: | GTGCACCTGGACCCTGTTGA      | 402 | 5          |
|                           | F: | TGGGACTGGTGACAATTGTC      |     |            |
| <i>Trim24</i>             | R: | GAGTACAGGTGTGCACCTCT      | 150 | This paper |
|                           | F: | GCCATTCGCCACCCAAGT        |     |            |
| <i>Zfp37</i>              | R: | CAGCTTGTACATACCTGATTAGACT | 198 | This paper |
|                           | F: | GGACCTGACAAAGCCAGAGG      |     |            |
|                           | R: | TGATTTCCCATGGAGGCTGG      |     |            |

**Supplemental Table 8:** Overview of MEF lines used for the various assays

| Assay                | Induction  | MEF lines      |           |           |           |           |           |            |                |                    |           |           |                    |           |               |
|----------------------|------------|----------------|-----------|-----------|-----------|-----------|-----------|------------|----------------|--------------------|-----------|-----------|--------------------|-----------|---------------|
|                      |            | <i>F-Kdm4b</i> |           |           |           |           |           |            | <i>M-Kdm4b</i> | <i>F-Kdm4b/iPS</i> |           |           | <i>M-Kdm4b/iPS</i> |           | <i>WT/iPS</i> |
|                      | Dox (days) | #1<br>(♂)      | #3<br>(♀) | #4<br>(♀) | #5<br>(♀) | #6<br>(♀) | #9<br>(♂) | #11<br>(♀) | #13<br>(♀)     | #1<br>(♀)          | #2<br>(♂) | #7<br>(♂) | #1<br>(♀)          | #3<br>(♀) | #1<br>(♂)     |
| Flow cytometry       | 1-2        | √              | -         | √         | √         | √         | √         | √          | √              | -                  | -         | -         | -                  | -         | -             |
| qPCR                 | 2          | -              | -         | √         | √         | √         | -         | √          | -              | -                  | -         | -         | -                  | -         | -             |
| Microarray           | 2          | -              | -         | √         | √         | √         | -         | -          | -              | -                  | -         | -         | -                  | -         | -             |
| mRNA-seq             | 2          | -              | -         | √         | √         | √         | -         | -          | -              | -                  | -         | -         | -                  | -         | -             |
| Immunofluorescence   | 2          | √              | √         | √         | √         | -         | -         | √          | -              | -                  | -         | -         | -                  | -         | -             |
| Western blot         | 2          | -              | -         | -         | √         | -         | -         | √          | -              | -                  | -         | -         | -                  | -         | -             |
| Demethylase activity | 2          | -              | -         | -         | √         | √         | -         | -          | -              | -                  | -         | -         | -                  | -         | -             |
| NT                   | 1          | -              | -         | √         | √         | √         | -         | √          | √              | -                  | -         | -         | -                  | -         | -             |
| NT ± HDACi           | 1          | √              | √         | -         | -         | -         | √         | -          | -              | -                  | -         | -         | -                  | -         | -             |
| iPS colony formation | 21         | -              | -         | -         | -         | -         | -         | -          | -              | √                  | √         | √         | √                  | √         | √             |
| Teratoma or chimera  | 21         | -              | -         | -         | -         | -         | -         | -          | -              | √                  | √         | √         | -                  | -         | -             |

√=tested for this assay; -=not determined; NT=Nuclear transfer, WT=wild-type

**Supplemental Table 9: Primary and secondary antibodies**

| <i>Antibody</i>                   | <i>Dilution</i> |         | <i>Manufacturer (Cat.-no.)</i>         |
|-----------------------------------|-----------------|---------|----------------------------------------|
|                                   | IF              | WB      |                                        |
| Alexa Fluor donkey anti mouse 488 | 1:1000          | NA      | Thermo Fisher (Cat-A11008)             |
| Alexa Fluor goat anti rabbit 568  | 1:1000          | NA      | Thermo Fisher (Cat-A11011)             |
| Goat anti rabbit HRP              | NA              | 1:10000 | Thermo Fisher (Cat-G21234)             |
| Mouse anti GFP                    | 1:1000          | NA      | Thermo Fisher (Cat-A11120)             |
| Rabbit anti H3K9Ac                | 1:250           | NA      | Millipore (Cat-04-1003)                |
| Rabbit anti H3K9me1               | 1:1000          | 1:6000  | Gift by T Jenuwein (Freiburg, Germany) |
| Rabbit anti H3K9me2               | 1:1000          | 1:3000  | Gift by T Jenuwein (Freiburg, Germany) |
| Rabbit anti H3K9me3               | 1:1000          | 1:3000  | Gift by T Jenuwein (Freiburg, Germany) |
| Rabbit anti H3K27me3              | 1:1000          | 1:3000  | Gift by T Jenuwein (Freiburg, Germany) |
| Rabbit anti H3K36me3              | 1:500           | 1:1000  | Cell Signaling (#9763)                 |
| Rabbit anti NANOG                 | 1:100           | NA      | Abcam (ab80892)                        |

NA=not applied

## SUPPLMENTAL REFERENCES

- 1 Pearton, D. J. *et al.* Elf5 counteracts precocious trophoblast differentiation by maintaining Sox2 and 3 and inhibiting Hand1 expression. *Dev Biol* **392**, 344-357, doi:10.1016/j.ydbio.2014.05.012 (2014).
- 2 Antony, J., Oback, F., Chamley, L. W., Oback, B. & Laible, G. Transient JMJD2B-Mediated Reduction of H3K9me3 Levels Improves Reprogramming of Embryonic Stem Cells into Cloned Embryos. *Molecular and cellular biology* **33**, 974-983, doi:10.1128/MCB.01014-12 (2013).
- 3 Tiedt, R. *et al.* Ratio of mutant JAK2-V617F to wild-type Jak2 determines the MPD phenotypes in transgenic mice. *Blood* **111**, 3931-3940, doi:10.1182/blood-2007-08-107748 (2008).
- 4 Peters, J. *et al.* A cluster of oppositely imprinted transcripts at the Gnas locus in the distal imprinting region of mouse chromosome 2. *Proceedings of the National Academy of Sciences* **96**, 3830-3835, doi:10.1073/pnas.96.7.3830 (1999).
- 5 Lambert, J.-F. *et al.* Quick sex determination of mouse fetuses. *Journal of Neuroscience Methods* **95**, 127-132, doi:10.1016/s0165-0270(99)00157-0 (2000).
